# Supplementary material for: BioInfograph: An Online Tool to Design and Display Multi-Panel Scientific Figure Interactively
Source: Frontiers journal article supplement (doi:10.3389/fgene.2021.784531), 2022-01-05
Supplement: Image_1.pdf [file Image_1.pdf]

## Supplementary Material

### 1 Supplementary Figures

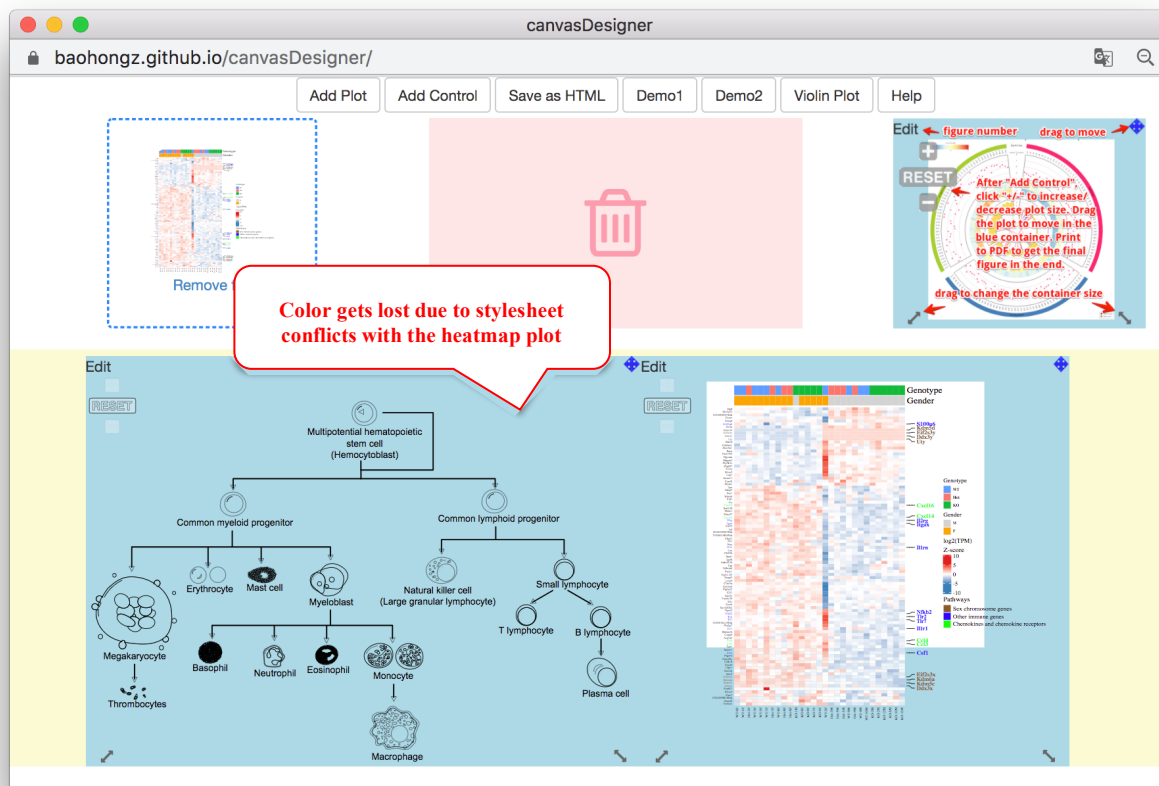

**Supplementary Figure 1.** Human blood cell lineage plot loses all of its colors due to conflicting stylesheet definition in heatmap plot by using canvasDesigner tool. On the contrary, localization of styles to individual elements in bioInfograph solves the issue as shown in Figure 1C.

## 2 Supplementary Links

Google Chrome (<https://www.google.com/chrome>) is recommended for optimal use of the web-based tool, bioInfograph.

bioInfograph: <https://baohongz.github.io/bioInfograph>

bioInfograph source code: <https://github.com/baohongz/bioInfograph>

Example SVG files: <https://github.com/baohongz/bioInfograph/tree/gh-pages/SVG>

Inkscape: Tool to edit SVG files, convert image files from other formats to SVG format.  
<https://inkscape.org>

pdf2svg: A simple PDF to SVG converter using the Poppler and Cairo libraries.  
<https://github.com/dawbarton/pdf2svg>

SVGOMG: SVG optimizer to minimize the size of SVG files. <https://jakearchibald.github.io/svgomg>

Coral: Clear and customizable visualization of human kinome data. <http://phanstiel-lab.med.unc.edu/CORAL>

ComplexHeatmap: Complex heatmaps are efficient to visualize associations between different sources of data sets and reveal potential patterns.  
<https://www.bioconductor.org/packages/release/bioc/html/ComplexHeatmap.html>

Wikimedia Commons: media file collection of 59.4 million freely usable media files to which anyone can contribute. [https://commons.wikimedia.org/wiki/Main\\_Page](https://commons.wikimedia.org/wiki/Main_Page)

WikiPathways: a database of biological pathways maintained by and for the scientific community.  
<https://www.wikipathways.org/index.php/WikiPathways>

Reactome: a free, open-source, curated and peer-reviewed pathway database. Our goal is to provide intuitive bioinformatics tools for the visualization, interpretation and analysis of pathway knowledge to support basic research, genome analysis, modeling, systems biology and education.  
<https://reactome.org>

PyMOL: a user-sponsored molecular visualization system on an open-source foundation, maintained and distributed by Schrödinger. <https://pymol.org>
